# Supplementary material for: Ecosystem metabolism drives pH variability and modulates long-term ocean acidification in the Northeast Pacific coastal ocean
Source: PubMed Central journal article supplement (PMC6353961; doi:10.1038/s41598-018-37764-4), 2019-01-30
Supplement: 41598_2018_37764_MOESM1_ESM.pdf [file 41598_2018_37764_MOESM1_ESM.pdf]

Ecosystem metabolism drives pH variability and modulates long-term ocean acidification  
in the Northeast Pacific coastal ocean

Alexander T. Lowe<sup>1,2\*</sup>, Julia Bos<sup>3</sup>, and Jennifer Ruesink<sup>2</sup>

<sup>1</sup>Current address: Tennenbaum Marine Observatories Network, Smithsonian Institution,  
647 Contees Wharf Road, Edgewater, MD 21307

<sup>2</sup>Department of Biology, University of Washington, 24 Kincaid Hall, Seattle, WA, USA  
98195

<sup>3</sup>Washington Department of Ecology, 300 Desmond Dr. SE, Lacey, WA, USA 98503

\*Corresponding author phone: 1-206-697-2765, email: [lowea@si.edu](mailto:lowea@si.edu)

Supplementary Table 1. Locations and descriptions of sampling sites.

| Site    | Subregion          | Habitat   | Sampling | Max Depth (m) | Latitude | Longitude |
|---------|--------------------|-----------|----------|---------------|----------|-----------|
| GYS004  | Coastal Estuary    | Tideflat  | Core     | 24            | 46.9779  | -123.7846 |
| GYS008  | Coastal Estuary    | Tideflat  | Core     | 7             | 46.9373  | -123.9132 |
| GYS009  | Coastal Estuary    | Tideflat  | Rotating | 16.5          | 46.9645  | -123.9496 |
| GYS015  | Coastal Estuary    | Tideflat  | Rotating | 16.5          | 46.9229  | -124.0768 |
| GYS016  | Coastal Estuary    | Tideflat  | Core     | 13            | 46.9534  | -124.093  |
| WPA001  | Coastal Estuary    | Tideflat  | Core     | 12            | 46.6873  | -123.7499 |
| WPA003  | Coastal Estuary    | Tideflat  | Core     | 10.5          | 46.704   | -123.8374 |
| WPA004  | Coastal Estuary    | Tideflat  | Core     | 18.5          | 46.6868  | -123.9735 |
| WPA006  | Coastal Estuary    | Nearshore | Core     | 21.5          | 46.5454  | -123.9802 |
| WPA007  | Coastal Estuary    | Tideflat  | Core     | 18            | 46.4532  | -124.0096 |
| WPA008  | Coastal Estuary    | Tideflat  | Core     | 19.5          | 46.4632  | -123.9413 |
| WPA113  | Coastal Estuary    | Tideflat  | Core     | 12            | 46.644   | -123.993  |
| HCB003  | Hood Canal         | Channel   | Core     | 162           | 47.5379  | -123.0096 |
| HCB004  | Hood Canal         | Nearshore | Core     | 55.5          | 47.3562  | -123.0249 |
| HCB007  | Hood Canal         | Nearshore | Core     | 37            | 47.3981  | -122.9296 |
| HCB008  | Hood Canal         | Channel   | Rotating | 112           | 47.7533  | -122.745  |
| HCB009  | Hood Canal         | Channel   | Rotating | 97            | 47.6883  | -122.75   |
| HCB010  | Hood Canal         | Channel   | Core     | 103           | 47.67    | -122.82   |
| PGA001  | Hood Canal         | Nearshore | Rotating | 22.5          | 47.8398  | -122.5813 |
| ADM001  | Central Salish Sea | Channel   | Core     | 153           | 48.0298  | -122.6179 |
| ADM002  | Central Salish Sea | Channel   | Core     | 97            | 48.1873  | -122.843  |
| Bayview | Central Salish Sea | Tideflat  | Core     | 4.5           | 48.4961  | -122.5021 |
| BLL009  | Central Salish Sea | Nearshore | Core     | 31            | 48.6859  | -122.5996 |
| BLL011  | Central Salish Sea | Nearshore | Rotating | 24            | 48.7332  | -122.5846 |
| DIS001  | Central Salish Sea | Nearshore | Rotating | 42.5          | 48.0181  | -122.8479 |
| DRA002  | Central Salish Sea | Nearshore | Rotating | 23            | 48.9832  | -122.763  |
| DUN001  | Central Salish Sea | Nearshore | Rotating | 19.5          | 48.1731  | -123.1146 |
| EAS001  | Central Salish Sea | Nearshore | Rotating | 34            | 48.6429  | -122.8835 |
| FID001  | Central Salish Sea | Tideflat  | Rotating | 16.5          | 48.5126  | -122.5952 |
| FRI001  | Central Salish Sea | Nearshore | Rotating | 19.5          | 48.5382  | -123.013  |
| FSH001  | Central Salish Sea | Tideflat  | Rotating | 5.5           | 48.5098  | -122.918  |
| Gong    | Central Salish Sea | Nearshore | Core     | 20            | 48.5583  | -122.5725 |
| GRG002  | Central Salish Sea | Channel   | Core     | 205.5         | 48.8082  | -122.9541 |
| JDF005  | Central Salish Sea | Nearshore | Rotating | 39.5          | 48.0609  | -123.031  |
| JDF007  | Central Salish Sea | Nearshore | Rotating | 29            | 48.0484  | -123.0096 |
| LOP001  | Central Salish Sea | Nearshore | Rotating | 16            | 48.5132  | -122.8513 |
| PAH003  | Central Salish Sea | Nearshore | Rotating | 22.5          | 48.1348  | -123.4607 |
| PAH008  | Central Salish Sea | Nearshore | Rotating | 19            | 48.1215  | -123.3513 |
| Ploeg   | Central Salish Sea | Tideflat  | Core     | 4.5           | 48.5563  | -122.5308 |
| PTH005  | Central Salish Sea | Nearshore | Core     | 36.5          | 48.0831  | -122.7646 |

|        |                    |           |          |       |         |           |
|--------|--------------------|-----------|----------|-------|---------|-----------|
| RSR837 | Central Salish Sea | Channel   | Rotating | 60    | 48.6165 | -122.763  |
| SEQ002 | Central Salish Sea | Nearshore | Rotating | 31.5  | 48.0765 | -123.018  |
| ADM003 | Puget Sound        | Channel   | Core     | 214   | 47.879  | -122.4832 |
| CMB003 | Puget Sound        | Channel   | Core     | 158.5 | 47.2904 | -122.4501 |
| CMB006 | Puget Sound        | Nearshore | Rotating | 53.5  | 47.2615 | -122.4373 |
| DYE004 | Puget Sound        | Nearshore | Rotating | 28.5  | 47.6223 | -122.6896 |
| EAG001 | Puget Sound        | Nearshore | Rotating | 20.5  | 47.6217 | -122.5017 |
| EAP001 | Puget Sound        | Channel   | Core     | 212.5 | 47.417  | -122.3804 |
| ELB015 | Puget Sound        | Channel   | Core     | 131.5 | 47.5965 | -122.3696 |
| HLM001 | Puget Sound        | Nearshore | Rotating | 53.5  | 48.0637 | -122.5332 |
| PMA001 | Puget Sound        | Nearshore | Rotating | 51.5  | 47.7348 | -122.5346 |
| PNN001 | Puget Sound        | Nearshore | Rotating | 31    | 48.2309 | -122.6757 |
| POD006 | Puget Sound        | Tideflat  | Rotating | 16    | 47.7148 | -122.6346 |
| POD007 | Puget Sound        | Tideflat  | Rotating | 6     | 47.7332 | -122.6513 |
| PSB003 | Puget Sound        | Channel   | Core     | 110   | 47.6598 | -122.4429 |
| PSS008 | Puget Sound        | Nearshore | Rotating | 37.5  | 47.9815 | -122.2235 |
| PSS010 | Puget Sound        | Channel   | Rotating | 109.5 | 47.965  | -122.2633 |
| PSS019 | Puget Sound        | Channel   | Core     | 107   | 48.0109 | -122.3013 |
| QMH001 | Puget Sound        | Nearshore | Rotating | 21.5  | 47.3798 | -122.4662 |
| QMH002 | Puget Sound        | Tideflat  | Rotating | 13    | 47.3965 | -122.4429 |
| SAR003 | Puget Sound        | Channel   | Core     | 150   | 48.1076 | -122.4915 |
| SIN001 | Puget Sound        | Nearshore | Core     | 18    | 47.5493 | -122.6435 |
| SKG001 | Puget Sound        | Nearshore | Rotating | 29.5  | 48.3957 | -122.4896 |
| SKG003 | Puget Sound        | Nearshore | Core     | 25    | 48.2965 | -122.4896 |
| SUZ001 | Puget Sound        | Channel   | Rotating | 107   | 48.1351 | -122.3707 |
| BML001 | S Puget Sound      | Tideflat  | Rotating | 14    | 47.3776 | -122.6337 |
| BUD002 | S Puget Sound      | Tideflat  | Rotating | 14    | 47.0515 | -122.9063 |
| BUD005 | S Puget Sound      | Nearshore | Core     | 20    | 47.092  | -122.9182 |
| CRR001 | S Puget Sound      | Channel   | Core     | 110   | 47.2765 | -122.7096 |
| CSE001 | S Puget Sound      | Channel   | Core     | 66.5  | 47.2645 | -122.8443 |
| CSE002 | S Puget Sound      | Nearshore | Rotating | 24.5  | 47.3532 | -122.8146 |
| DNA001 | S Puget Sound      | Channel   | Core     | 51.5  | 47.1615 | -122.8718 |
| ELD001 | S Puget Sound      | Nearshore | Rotating | 23    | 47.1062 | -122.9499 |
| ELD002 | S Puget Sound      | Tideflat  | Rotating | 15    | 47.0962 | -122.9754 |
| GOR001 | S Puget Sound      | Channel   | Core     | 171   | 47.1832 | -122.6346 |
| HND001 | S Puget Sound      | Nearshore | Rotating | 25.5  | 47.1512 | -122.8343 |
| NSQ001 | S Puget Sound      | Nearshore | Rotating | 33    | 47.1123 | -122.6985 |
| NSQ002 | S Puget Sound      | Channel   | Core     | 111   | 47.1673 | -122.7882 |
| OAK004 | S Puget Sound      | Nearshore | Core     | 28    | 47.2134 | -123.0777 |
| PCK001 | S Puget Sound      | Nearshore | Rotating | 22    | 47.2484 | -122.9249 |
| STL001 | S Puget Sound      | Channel   | Rotating | 122.5 | 47.1848 | -122.6112 |
| TOT001 | S Puget Sound      | Nearshore | Rotating | 31.5  | 47.1643 | -122.9646 |
| TOT002 | S Puget Sound      | Tideflat  | Rotating | 17    | 47.1215 | -123.0213 |

Supplementary table 2. Results of linear mixed effects model comparing pH variation to metabolic (%DO), biological (chlorophyll), physical (temperature and salinity) and climatic (atmospheric CO<sub>2</sub>) drivers. (see methods for details, briefly: LME model with 3123 observations scaled to (x-μ)/SD. Fixed effects shown, random effects = Subregion + Seas.

| Variable                   | Estimate | SE    | $X^2$   | $p$    |
|----------------------------|----------|-------|---------|--------|
| DO % Saturation            | 0.598    | 0.016 | 1141.00 | <0.001 |
| Atmosphere CO <sub>2</sub> | -0.163   | 0.012 | 165.76  | <0.001 |
| Temperature                | 0.127    | 0.020 | 40.58   | <0.001 |
| Salinity                   | 0.047    | 0.014 | 11.04   | <0.001 |
| Chlorophyll                | 0.042    | 0.014 | 8.81    | 0.003  |
